***Mycobacterium ulcerans* low infectious dose and atypical mechanical transmission  
support insect bites and puncturing injuries in the spread of Buruli ulcer.**

John R. Wallace<sup>1</sup>, Kirstie M. Mangas<sup>2</sup>, Jessica L. Porter<sup>2</sup>, Renee Marcsisin<sup>2</sup>, Sacha J. Pidot<sup>2</sup>, Brian Howden<sup>2</sup>,  
Till F. Omansen<sup>2,3</sup>, Weiguang Zeng<sup>2</sup>, Jason K. Axford<sup>4</sup>, Paul D. R. Johnson<sup>4</sup> and Timothy P. Stinear<sup>2,\*</sup>

<sup>1</sup>Department of Biology, Millersville University, PA, USA

<sup>2</sup>Department of Microbiology and Immunology, at the Peter Doherty Institute for Infection and Immunity,  
University of Melbourne, Melbourne, 3000, Australia

<sup>3</sup>Department of Internal Medicine, University of Groningen, Groningen, 9700 RB, The Netherlands

<sup>4</sup>Pest and Environmental Adaptation Research Group, Bio21 Institute and School of BioSciences, University  
of Melbourne, Parkville, Vic 3052, Australia.

<sup>5</sup>Department of Infectious Diseases, Austin Health, Heidelberg, Victoria, 3084, Australia

**\*Corresponding authors:** [tstinear@unimelb.edu.au](mailto:tstinear@unimelb.edu.au), [john.wallace@millersville.edu](mailto:john.wallace@millersville.edu)

**\*Corresponding authors:** [tstinear@unimelb.edu.au](mailto:tstinear@unimelb.edu.au), [john.wallace@millersville.edu](mailto:john.wallace@millersville.edu)

## 20     **Abstract**

21     Addressing the transmission enigma of the neglected disease Buruli ulcer (BU) is a World Health  
 22     Organization priority. In Australia, we have been building a hierarchy of evidence implicating mosquitoes in  
 23     transmission. Here we tested a contaminated skin model of BU transmission by dipping the tails from healthy  
 24     mice in cultures of the causative agent, *Mycobacterium ulcerans*. Tails were exposed to mosquito blood  
 25     feeding or punctured with sterile needles. Two of 11 of mice with *M. ulcerans* contaminated tails exposed to  
 26     feeding mosquitoes developed BU. Eighteen of 20 mice subjected to contaminated tail needle puncture  
 27     across developed BU. Mouse tails coated only in bacteria did not develop disease. We observed a low  
 28     infectious dose-50 of four colony-forming units and a median incubation time of 12 weeks, overlapping data  
 29     from human infections. We have uncovered a highly efficient and biologically plausible atypical  
 30     transmission mode of BU via natural or anthropogenic skin punctures.

31

32

### 33 **Introduction**

34 Among the 17 neglected tropical diseases the World Health Organization (WHO) has targeted for control and  
 35 elimination, only Leprosy and Buruli ulcer (BU) have unknown modes of transmission (1). The search to  
 36 understand how humans contract BU spans more than 70 years since the causative agent, *Mycobacterium*  
 37 *ulcerans*, was first identified (2). There are persistent and emerging foci of BU cases across the world, in  
 38 particular Africa and Australia (3). BU is characterized by necrotizing skin lesions, caused by localized  
 39 proliferation of *M. ulcerans* in subcutaneous tissue. BU is rarely fatal, but untreated infections leave patients  
 40 with significant disfigurement and disability, with damaging personal and economic consequences (4,  
 41 5). Researchers have long been struck by the characteristic epidemiology of BU, with cases occurring in  
 42 highly geographically circumscribed regions (sometimes less than a few square kilometres) and risk factors  
 43 for infection that include gardening, insect bites and proximity to (but not necessarily contact with)  
 44 lacustrine/riverine regions (6-14). Human-to-human spread is considered unlikely (14). Disease transmission  
 45 is thought to occur by contact with an environment contaminated with *M. ulcerans* but exactly where the  
 46 pathogen resides and why it appears so geographically restricted have yet to be determined. (15).

48 *M. ulcerans* is very slow growing (doubling time >48 hrs) and this poses a problem for source tracking  
 49 efforts as it is difficult to isolate the bacteria in pure culture from complex environmental specimens (16). *M.*  
 50 *ulcerans* has only once been isolated from a non-clinical source, an aquatic water bug (Gerridae) from Benin,  
 51 West Africa (16). Quantitative PCR targeting *M. ulcerans*-specific DNA is the most frequently used  
 52 technique in surveys of environmental specimens. A comprehensive review of the many field and lab studies  
 53 that have examined reservoir and transmission of BU has highlighted the range of organisms from aquatic  
 54 insects, fish, amphibia, and in Australia certain native marsupials that can serve as potential reservoirs for *M.*  
 55 *ulcerans* (15, 17). Since the first observation that biting aquatic insects can harbour *M. ulcerans* (18), studies  
 56 of BU transmission have largely focused on the potential for insects to biologically vector *M. ulcerans*  
 57 implying that *M. ulcerans* undergoes a propagative or reproductive mode of development in an insect (19-  
 58 23). Several case-control studies, including from both Australia and Africa have suggested insects may play a

role in transmission (10, 11). However, there is no compelling experimental evidence for single-mode biological transmission of *M. ulcerans* via insect vectors.

In southeastern Australia we noted Buruli lesions on exposed areas likely to attract biting insects, some patients with every brief exposure times to endemic areas (24, 25) and 2004 we began a study that identified *M. ulcerans* DNA associated with mosquitoes captured in endemic areas (19). Here, we provide laboratory evidence for atypical mechanical transmission of *M. ulcerans* to add to a hierarchy of evidence we have now assembled by formally addressing the Barnett Criteria (26). These are the vector ecology equivalent of Koch's Postulates and are established stringent criteria used for indicting living and non-living vectors of pathogens (15). Reworded for Buruli ulcer, these criteria state: (i) an insect vector must acquire *M. ulcerans* from a reservoir host and become infected or contaminated, (ii) an insect vector must have close association with infected animals (including humans), (iii) an insect vector collected from a Buruli ulcer endemic area must be repeatedly found with *M. ulcerans*, (iv) transmission must be experimentally demonstrated. Previously we performed a case-control study (49 cases and 609 controls), with the main findings that infection risk was increased with frequent mosquito bites (odds ratio 2.6, 95% c.i. 1.2-5.5) and reduced by use of insect repellent (odds ratio 0.4, 95% c.i. 0.2 – 0.7) (11). Then, between 2004 and 2006 we trapped 11,504 mosquitoes and detected *M. ulcerans* in 4.28/1000 individual mosquitoes (95% c.i. 3.2 – 5.6/1000) (19). We next established that there was a consistent positive correlation between annual notifications of Ross River virus (known to be transmitted by mosquitoes) and Buruli ulcer cases in Victoria, suggesting that the year-to-year variation in incidence of these different diseases is influenced by the same environmental conditions (27). We also used genotyping to show *M. ulcerans* detected in mosquitoes was indistinguishable from *M. ulcerans* infecting humans (28). Finally, we continued to test mosquitoes and accumulated data from 41,797 mosquitoes across seven locations to reveal a strong dose-response relationship between risk of Buruli ulcer and the proportion of positive mosquitoes (20). We thus satisfied criteria (i), (ii) and (iii) and here we describe experiments to address criterion (iv), to provide the laboratory evidence that *M. ulcerans* can be transmitted to a mammalian host by biting.

85

86 We have established two laboratory models of BU transmission and show for the first time a highly  
87 efficient atypical mode of mechanical transmission of *M. ulcerans* to a mammalian host that implicates both  
88 biting insects and puncturing injuries.

89

## 90 **Materials and Methods**

### 91 *Bacterial isolates and culture conditions*

92 *M. ulcerans* strain JKD8049 was cultured in 7H9 broth or Middlebrook 7H10 agar, containing 10% oleic-  
93 albumin-dextrose-catalase growth supplement (Middlebrook, Becton Dickinson, Sparks, MD, USA) and  
94 0.5% glycerol (v/v) at 30°C. Colony counts from bacterial cultures or tissue specimens were performed using  
95 spot plating. Five x 3µl volumes of serial 10-fold dilutions ( $10^{-1}$  to  $10^{-5}$ ) of a culture or tissue preparation  
96 were spotted onto 7H10 agar plates with a 5x5 grid marked. The spots were allowed to dry, the plates loosely  
97 wrapped in plastic bags and then incubated as above for 10 weeks before counting colonies. Data analysis  
98 was performed using GraphPad Prism (v 6.0). All culture extracts were screened by LC-MS for the presence  
99 of mycolactones as previously described to ensure bacteria used in transmission experiments remained fully  
100 virulent (29).

101

### 102 *Experimental animals*

103 The animal ethics committee (AEC) of the University of Melbourne approved all animal experiments under  
104 approval number AEC: 1312775.2. BALB/c mice were purchased from ARC (Canning Vale, Australia) and  
105 housed in individual ventilated cages. Upon arrival, animals were acclimatizing for 5 days. Food and water  
106 were given *ad libitum*.

107

108 *Aedes notoscriptus* and *Aedes aegypti* rearing. Wild caught mosquitoes were sourced from around Cairns,  
109 Queensland, Australia. *A. notoscriptus* and *A. aegypti* colonies were reared in a Physical Containment Level  
110 2 (PC2) laboratory environment at 26±1°C using previously described methods, with the addition of brown

paper used as the oviposition substrate for *A. notoscriptus* (30).

### *Mosquito-mouse transmission experiments*

Two infection models were established as summarized in Fig. 1. In model-1 (Fig. 1A), 4-week old female BALB/c mice were anaesthetized and their tails coated in a thin film of *M. ulcerans* by dipping the tails in a Petri dish containing 20mL of bacterial culture (concentration  $\sim 10^6$  CFU/mL). The tail only was then exposed to a 200mm x 200mm x 200mm cage containing 20 adult, female mosquitoes for a period of 15 minutes. The number of insects biting each mouse was recorded over the exposure period by continuous observation. Mice were then observed weekly for up to six months for signs of tail lesions. Sterile needle stick (25G or 30G needle) and no-trauma were used as controls. An additional control consisted of tails dipped in sterile culture broth only and subjected to mosquito biting or sterile needle stick. In model-2 (Fig. 1B), 180 adult female *A. notoscriptus* mosquitoes were fed for 48h via a 4 x 5 cm sponge saturated with a 0.5% sucrose solution (w/v) containing  $\sim 10^5$  CFU/mL *M. ulcerans*. The solution was withdrawn and 24h later the mosquitoes were allowed to bite and feed to repletion for the same 15-minute exposure period, with each bite recorded.

*Real time quantitative PCR.* For each mosquito that blood-fed under transmission model-1 and for every mosquito exposed to the mice under transmission model-2, DNA was individually extracted from the dissected head, abdomen and legs of each insect using the Mo Bio Powersoil DNA extraction kit following manufacturer's instructions (Mo Bio Laboratories Inc., Carlsbad CA USA). DNA was similarly extracted from mouse tissue. Procedural extraction control blanks (sterile water) were included at a frequency of 10% to monitor potential PCR contamination, in addition to no-template negative controls. IS2404 quantitative PCR (qPCR) was performed as described (31). IS2404 cycle threshold (Ct) values were converted to genome equivalents (GE) to estimate bacterial load within a sample by reference to a standard curve ( $r^2=0.9312$ ,  $y=[-3.000\ln(x)+39.33]*Z$ , where  $y=Ct$  and  $x=\text{amount of DNA [fg]}$  and  $Z=\text{the dilution factor}$ ]), calculated using dilutions of genomic DNA from *M. ulcerans* strain JKD8049, quantified using fluorimetry (Qubit,

Invitrogen) (31).

*Preparation of mouse tissue for analysis.* At the end of the experimental period or when a clinical end-point was reached mice were humanely killed. The region of a mouse-tail spanning a likely lesion was cut into three equal sections for histology, qPCR and CFU counts. Individual tail pieces for CFU counts were weighed and placed into sterile 2ml screw capped tube containing 0.5g of 0.1mm glass beads and 600µl of sterile 1x PBS. Tissues were homogenized using four rounds of 2 x 30second pulses in a high-speed tissue-disruptor at 6500 rpm, with tubes placed on ice for 5 minutes between each round. A 300µl volume of this homogenate was decontaminated with 300µl of 2% NaOH (v/v) and incubated at room temperature for 15 minutes. The preparation was neutralized drop-wise with a 10% solution of orthophosphoric acid (v/v) with added bromophenol blue until the solution changed from blue to clear. The mixtures were diluted in PBS and CFUs determined by spot plating as described above.

*Histology.* Sections of mouse-tails were fixed in 10% (w/v) neutral-buffered-formalin and imbedded in paraffin. Each mouse-tail was sectioned transversely (four micron thickness) and subjected to Ziehl-Neelson and hematoxylin/eosin staining. The fixed and stained tissue sections were examined by light microscopy.

*Infectious Dose.* To estimate the infectious dose we measured the surface area of five dissected mouse-tails to obtain an average surface area ( $493.3 \pm 41.1 \text{ mm}^2$ ). Using ten mouse-tails, we then calculated the average volume of *M. ulcerans* 7H9 Middlebrook culture adhering to the tail surface ( $32.4 \pm 4.2 \text{ mL}$ ), the concentration of bacteria in the cultures used, and the surface area of the tips of 25G and 30G needles used to deliver the puncture wounds ( $0.207 \text{ mm}^2$  and  $0.056 \text{ mm}^2$ , respectively). These parameters were then used to calculate the infectious dose, assuming the bacteria were evenly distributed over the tail surface (Fig. 1C). A standard curve was interpolated using non-linear regression and an  $\text{ID}_{50}$  estimated using GraphPad Prism (v 7.0a).

## Results

*M. ulcerans* is efficiently transmitted to a mammalian host by an atypical mechanical means.

We established a murine model of *M. ulcerans* transmission (model-1) that represented a skin surface contaminated with the bacteria and then subjected to a minor penetrating trauma, via either a mosquito bite or needle stick puncture. In our first experiment, two of six mice with their tails coated with *M. ulcerans* and then bitten by mosquitoes developed lesions (Table 1, Fig. 1C, Fig. 2A). Histology of these lesions confirmed a subcutaneous focus of AFB, within a zone of necrotic tissue. There was also characteristic epithelial hyperplasia adjacent to the site of infection (Fig. 2B,C). Material extracted from the lesions was IS2404 qPCR-positive and culture positive for *M. ulcerans* (Supplementary Table S1). Mice bitten by mosquitoes but with tails coated only with sterile culture media did not develop lesions (Table 1). In the same experiment, we also subjected five mice to a single needle stick puncture. Each mouse had their tail coated with *M. ulcerans* as for the mosquito biting. Four of these five mice developed *M. ulcerans* positive lesions (Table 1, Fig. 2D), with subcutaneous foci of infection and viable bacteria (Fig. 2F). Six mice with their tails coated with *M. ulcerans* but not subjected to a puncturing injury did not develop lesions and remained healthy until the completion of the experiment at six months. This experiment suggested that minor penetrating skin trauma (defined here as a puncture <0.5mm diameter and <2mm deep) to a skin surface contaminated with *M. ulcerans* is sufficient to cause infection. It also revealed a means by which mosquitoes could act as atypical mechanical vectors of *M. ulcerans*.

*M. ulcerans* burden on mosquitoes correlates with transmission.

Then, using approximately the same dose of bacteria to coat the mouse-tails, we repeated experiment-1 but with *Aedes aegypti* because of the close association of this mosquito to humans world-wide and their vector competency for viral pathogens. Despite more mosquito bites per mouse than the first experiment, none of the five insect-exposed mice developed lesions (Table 1). In contrast however, four of five mice subjected to single, needle stick puncture developed *M. ulcerans* positive tail lesions (Table 1). We then conducted a third transmission experiment, but this time using mosquitoes (*Aedes notoscriptus*) in pools of 20 that had been



previously contaminated with the bacteria via a sugar meal solution and then allowed to bite the tails of naïve mice. None of five mice exposed to mosquitoes developed tail lesions, despite repeated bites. Again, three of three positive control mice with tails coated in *M. ulcerans* developed positive lesions after needle stick puncture (Table 1). We assessed the burden of *M. ulcerans* by individual IS2404 qPCR of the head, abdomen and legs for each mosquito that blood fed (Fig. 3). A summary of these results is shown in Fig. 3A. We noted that the bacterial load (expressed as genome equivalents [GE]) was significantly higher in the heads of mosquitoes associated with mice that developed lesions ( $p < 0.05$ ) (Fig. 3B). While *M. ulcerans* were present on the head, abdomen and legs of mosquitoes fed an *M. ulcerans*-contaminated sugar solution, the bacterial load on these insects was low (transmission model-2) (Fig. 3, Supplementary Table S2). These data point to a threshold, above which mosquitoes can become competent mechanical vectors for *M. ulcerans* transmission.

#### *Estimation of incubation period and infectious dose of transmission model-1*

Based on the time until a tail lesion was first observed, we estimated a median incubation period (IP) of 12 weeks (Fig. 4A). This result overlaps with the IP in humans for BU, estimated in different epidemiological studies from 4-10 weeks in Uganda during the 1960s (14) and 4 - 37 weeks in south east Australia (25). We also estimated the infectious dose<sub>50</sub> (ID<sub>50</sub>). We conducted a fourth experiment, using two doses of *M. ulcerans* to coat the tails of mice, followed by needle stick puncture (Table 1). Seven of seven mice receiving the higher dose and two of three mice receiving the lower dose developed *M. ulcerans* lesions (Table 1). Thus across the four experiments at the maximum dose 18 of 20 mice developed lesions when subjected to needle stick puncture through *M. ulcerans* contaminated skin. The data from all needle stick exposure experiments were combined and we estimated an ID<sub>50</sub> of 4 CFU (Fig. 4B). This assessment was based on measurements of the surface area of the mouse-tail, the volume of bacterial culture adhering to the tail and the diameter of the needle used in each experiment. To our knowledge this is the first estimate of an *M. ulcerans* infectious dose and indicates that a surprisingly small quantity of this slow growing mycobacterium is sufficient to cause disease in this model.

## Discussion

This research was designed around established frameworks for implicating vectors in disease transmission and provides the necessary causal evidence to substantially resolve the 80-year mystery on how *M. ulcerans* is spread to people (15, 26, 32). We have assessed two different models of mechanical rather than biological transmission of BU under controlled laboratory conditions. We show that *M. ulcerans* can be efficiently transmitted to a susceptible mammalian host at a low infectious dose, via puncturing injuries involving an anthropogenic pathway (needle stick) or a natural pathway (mosquito bite).

The efficient establishment of BU we have shown here via minor penetrating trauma through a contaminated skin surface is an atypical form of mechanical transmission *sensu lato* (*s.l.*) but it nonetheless satisfactorily fulfills the Barnett Criteria. In vector ecology, mechanical transmission, *sensu strictu* (*s.s.*), is defined as a non-circulative process involving accidental transport of the pathogen. That is, the pathogen, in some fashion, nonspecifically associates or contaminates the mouthparts (stylet) of an arthropod vector. This stylet-borne theory suggests that the vector physically transmits or moves the pathogen from one host and inoculates another (33, 34). Mechanical transmission is often described as a ‘flying pin’ method of transmission and implies that mosquito vectors serve as an inoculating needle or pin, as we observed in this study (35). There is laboratory evidence for this mode of transmission, with pins used to inoculate baby chicks with the Eastern Equine Encephalitis virus (36). Insect mechanical transmission *s.s.* of BU implies that if *M. ulcerans* were ingested and then egested via regurgitation or salivation, the mechanism would act more like a syringe than a needle (33, 37). Such a mode of *M. ulcerans* disease transmission was supported through laboratory studies in which *Naucoris* and Belostomatid water bugs were contaminated via feeding on maggot prey that had been injected with *M. ulcerans* or fed naturally on dietary contaminated larval mosquito prey (21-23, 38). Whilst one of these reports said there was replication of the bacteria within the insect vector, suggesting biological transmission, infection spread in this model could also be explained by mouthparts of the water bugs remaining contaminated and then subsequently inoculating mice during blood feeding<sup>(23)</sup>.

Adult mosquitoes generally acquire some form of carbohydrate or sugar meal from floral nectars for necessary energy to feed and reproduce (39). To investigate this aspect of mechanical transmission *s.s.*, we infected a sugar meal solution with *M. ulcerans* for adult mosquitoes to feed upon and later exposed these mosquitoes to naïve mice without any tail surface contamination (experiment 3). While mosquitoes readily fed on this solution and later fed on mouse tails, we found no ulcers after five months of observation (Table 1). The lack of ulcer development may have been due to insufficient concentration of *M. ulcerans* used in the sugar solution or the inability of mosquitoes to act as mechanical vectors *s.s.* of *M. ulcerans* under these laboratory conditions.

Our demonstration of mechanical transmission *s.l* implies there are potentially multiple or parallel pathways of *M. ulcerans* infection (26). Examples of bacterial diseases with multiple transmission modes include tularemia, plague and trachoma (40, 41). Support for our mechanical transmission *s.l.* model also comes from the many field reports over the decades of *M. ulcerans* infection following trauma to the skin. Case reports have noted BU following a suite of penetrating injuries ranging from insect bites (ants, scorpions), snake bite, human bite, splinters, gunshot, hypodermic injections of medication and vaccinations (42-45). Epidemiologists in Uganda during the 1960s and 70s suggested sharp-edged grasses might introduce the bacteria (46). However a recent laboratory study established that abrasions of the skin in Guinea pig models and subsequent application of *M. ulcerans* was not enough to cause an ulcer, however, this same study established that a subcutaneous injection would cause an ulcer (47). As a sequel to this study in Guinea pigs, we raised the question of how likely it was that human skin could be sufficiently coated in *M. ulcerans* that an injury from natural or anthropogenic sources could lead to infection. Other explanations for the transmission of *M. ulcerans* include linkages with human behavior that increase direct contact with human skin and contaminated water (15). A recent study from Cameroon recorded the persistence of *M. ulcerans* over a 24-month period in a waterhole used by villagers (including BU patients) for bathing (48). A scenario could be readily envisaged where a villager's skin surface becomes contaminated after bathing in such a

water body and is primed for infection if (i) the concentration of bacteria is sufficiently high, and (ii) an inoculating event occurs. Whereas, in Australia, earlier studies have shown that *M. ulcerans* contamination of possum feces in and around the gardens of BU patients might present a similar skin surface contamination model in this region (17, 49). Our needle stick experiments support this non-arthropod-borne trauma to the skin surface via an anthropogenic method, as suggested more than 40 years ago (45, 46). Future experiments will address the possibility that insect vectors may be able to move *M. ulcerans* from one source and inject it into an animal (including humans).

The research presented here has been driven by our observations in southeastern Australia, where we've implicated mosquitoes in transmission (19, 20, 27, 28, 50). However, a recent study in Benin, West Africa found no evidence of *M. ulcerans* in association with adult mosquitoes (51). The authors concluded that the mode of transmission might differ between southeastern Australia and Africa. Although, laboratory and fieldwork in West Africa suggest that aquatic insects, including mosquito larvae, play a role as reservoirs in nature for *M. ulcerans* that may be indirectly tied to transmission by serving as dispersal mechanisms (18, 23, 52). The contaminated skin model provides a rational but non-exclusive explanation for BU transmission in parts of the world, such as rural parts of West Africa where BU is prevalent, and access to clean water for bathing, drinking, and other hygienic purposes can be limited. However, epidemiological studies have shown that direct contact with water is not a universal risk factor for BU (8, 11). In temperate, southeastern Australia where patients in this region have no contact with open water sources, are generally older and are unlikely to have regular exposure to biofilms where skin contamination may occur. Our focus on mechanical mosquito transmission *s.s.* arose from previous surveys in southeastern Australia where a strong association between *M. ulcerans* positive mosquitoes and human cases of BU has shown that *M. ulcerans* has not only been found on adult mosquitoes from both lab and field studies but also a biological gradient, where maximum likelihood estimates (MLE) of the proportion of *M. ulcerans*-positive mosquitoes increased as the number of cases of BU increased (19, 27, 28, 38, 50, 53).

Case-controls studies in the region have also shown that prior exposure to insect bites and gardening are

independent risk factors for developing BU, while use of insect repellent is protective (11, 54). Laboratory support to show mosquitoes can be competent vectors to spread BU was the final piece of evidence required to satisfy accepted vector ecology criteria (15, 26). We found that infection was established following very minor penetrating trauma. *Aedes notoscriptus* mosquitoes feed by insertion of a stylet, sheathed within the proboscis, beneath the skin of a host. The stylet has a diameter around 10  $\mu\text{m}$  tapering to 1  $\mu\text{m}$  at its tip and extending 1-2 mm below the skin surface. We estimated the density of *M. ulcerans* on the mouse-tails surface was 100-200 CFU/mm<sup>2</sup>. Thus the amount of bacteria potentially injected during mosquito feeding through this contaminated surface is likely to be low. Our infectious dose estimates from needle-stick punctures suggested an ID<sub>50</sub> of 4 CFU (Fig. 4B). There are strong parallels here with *M. leprae*, the agent of leprosy. Like BU, the mode of transmission of the leprosy bacillus is unclear, but the infectious dose is known to be very low (10 bacteria) and epidemiological evidence suggests multiple transmission pathways, including entry of the bacteria after skin trauma (55, 56).

The failure of *Aedes aegypti* to successfully transmit *M. ulcerans* in experiment 2 might be explained by either vector competency variations or simple morphological/physiological differences such as proboscis length or blood meal feeding time among different mosquito taxa (34, 35). We coated the mouse-tails in this experiment with an equivalent amount of *M. ulcerans* as experiment 1. A mosquito proboscis should have contacted (on average) the same density of bacteria at the tail surface during blood feeding. The needle-stick controls showed effective inoculation of the mice (Table 1). Our follow-up on the blood-fed mosquitoes bacterial load was revealing and showed that *A. aegypti* (experiment 2) carried significantly less *M. ulcerans* post-biting compared to *A. notoscriptus* (experiment 1) (Fig. 3). Whether this was a chance event or is a physiological characteristic of the different *Aedes* species or their feeding behaviours remains to be investigated, but clearly, if insufficient bacteria adhere to the insect during feeding then transmission is unlikely to occur.

In southeastern Australia, but so far not elsewhere, outbreaks of BU in humans are closely associated

with the presence of native animals (17, 49) that appear to act as reservoirs of *M. ulcerans*. Hence an attractive hypothesis is that mosquitoes passively shuttle *M. ulcerans* from possums with active Buruli lesions to humans living nearby (17). Based on clinical observations of lesion location, local clinicians have proposed mosquito transmission may be the major mode of transmission, although we have not so far been able to demonstrate this experimentally. We recognize that no similar animal reservoir has yet been identified in Africa and that multiple modes of transmission via other methods of inoculation, either by trauma or other types of biting insect if MU is already present on the skin is likely and is strongly supported by our results.

In summary, we have uncovered a highly efficient and biologically plausible atypical transmission mode of *M. ulcerans* infection via natural or anthropogenic skin punctures. Reduction of exposure to insect bites, access to clean water for bathing, and prompt treatment of existing BU are concrete measures likely to interrupt BU transmission.

### Acknowledgments:

This research was supported by NHMRC Project Grant 1049183 and NHMRC Research Fellowship 1008549 (TPS). JRW was supported in part by a grant (Internal # 6032305815) from End Buruli Ulcer Alliance and research grants from the Millersville University Faculty Grants program, Millersville University, Millersville, PA.

### References

1. Anon. Second WHO report on neglected tropical diseases: sustaining the drive to overcome the global impact of neglected tropical diseases. Geneva, Switzerland: World Health Organization; 2013. p. 11-7.
2. P. M, Tolhurst JC, Buckle G, Sissons HA. A new mycobacterial infection in man. The Journal of pathology and bacteriology. 1948 Jan;60(1):93-122.

- 344 3. Johnson PD, Stinear T, Small PL, Pluschke G, Merritt RW, Portaels F, et al. Buruli ulcer  
345 (M. ulcerans infection): new insights, new hope for disease control. PLoS medicine. 2005  
346 Apr;2(4):e108.
- 347 4. Amofah GK, Sagoe-Moses C, Adjei-Acquah C, Frimpong EH. Epidemiology of Buruli  
348 ulcer in Amansie West district, Ghana. Transactions of the Royal Society of Tropical Medicine and  
349 Hygiene. 1993 Nov-Dec;87(6):644-5.
- 350 5. Asiedu K, Etuaful S. Socioeconomic implications of Buruli ulcer in Ghana: a three-year  
351 review. The American journal of tropical medicine and hygiene. 1998 Dec;59(6):1015-22.
- 352 6. Debacker M, Portaels F, Aguiar J, Steunou C, Zinsou C, Meyers W, et al. Risk factors for  
353 Buruli ulcer, Benin. Emerging infectious diseases. 2006 Sep;12(9):1325-31.
- 354 7. Jacobsen KH, Padgett JJ. Risk factors for *Mycobacterium ulcerans* infection. International  
355 journal of infectious diseases : IJID : official publication of the International Society for Infectious  
356 Diseases. 2010 Aug;14(8):e677-81.
- 357 8. Landier J, Boisier P, Fotso Piam F, Noumen-Djeunga B, Sime J, Wantong FG, et al.  
358 Adequate wound care and use of bed nets as protective factors against Buruli Ulcer: results from a  
359 case control study in Cameroon. PLoS neglected tropical diseases. 2011 Nov;5(11):e1392.
- 360 9. Nackers F, Johnson RC, Glynn JR, Zinsou C, Tonglet R, Portaels F. Environmental and  
361 health-related risk factors for *Mycobacterium ulcerans* disease (Buruli ulcer) in Benin. The  
362 American journal of tropical medicine and hygiene. 2007 Nov;77(5):834-6.
- 363 10. Pouillot R, Matias G, Wondje CM, Portaels F, Valin N, Ngos F, et al. Risk factors for buruli  
364 ulcer: a case control study in Cameroon. PLoS neglected tropical diseases. 2007;1(3):e101.
- 365 11. Quek TY, Athan E, Henry MJ, Pasco JA, Redden-Hoare J, Hughes A, et al. Risk factors for  
366 *Mycobacterium ulcerans* infection, southeastern Australia. Emerging infectious diseases. 2007  
367 Nov;13(11):1661-6.
- 368 12. Raghunathan PL, Whitney EA, Asamoah K, Stienstra Y, Taylor TH, Jr., Amofah GK, et al.  
369 Risk factors for Buruli ulcer disease (*Mycobacterium ulcerans* Infection): results from a case-

control study in Ghana. *Clinical infectious diseases : an official publication of the Infectious Diseases Society of America*. 2005 May 15;40(10):1445-53.

13. Sopoh GE, Barogui YT, Johnson RC, Dossou AD, Makoutode M, Anagonou SY, et al. Family relationship, water contact and occurrence of Buruli ulcer in Benin. *PLoS neglected tropical diseases*. 2010;4(7):e746.

14. Uganda-Buruli-Group. Epidemiology of *Mycobacterium ulcerans* infection (Buruli ulcer) at Kinyara, Uganda. *Transactions of the Royal Society of Tropical Medicine and Hygiene*. 1971;65(6):763-75.

15. Merritt RW, Walker ED, Small PL, Wallace JR, Johnson PD, Benbow ME, et al. Ecology and transmission of Buruli ulcer disease: a systematic review. *PLoS neglected tropical diseases*. 2010;4(12):e911.

16. Portaels F, Meyers WM, Ablordey A, Castro AG, Chemlal K, de Rijk P, et al. First cultivation and characterization of *Mycobacterium ulcerans* from the environment. *PLoS neglected tropical diseases*. 2008;2(3):e178.

17. Fyfe JA, Lavender CJ, Handasyde KA, Legione AR, O'Brien CR, Stinear TP, et al. A major role for mammals in the ecology of *Mycobacterium ulcerans*. *PLoS neglected tropical diseases*. 2010;4(8):e791.

18. Portaels F, Elsen P, Guimaraes-Peres A, Fonteyne PA, Meyers WM. Insects in the transmission of *Mycobacterium ulcerans* infection. *Lancet*. 1999 Mar 20;353(9157):986.

19. Johnson PD, Azuolas J, Lavender CJ, Wishart E, Stinear TP, Hayman JA, et al. *Mycobacterium ulcerans* in mosquitoes captured during outbreak of Buruli ulcer, southeastern Australia. *Emerging infectious diseases*. 2007 Nov;13(11):1653-60.

20. Lavender CJ, Fyfe JA, Azuolas J, Brown K, Evans RN, Ray LR, et al. Risk of Buruli ulcer and detection of *Mycobacterium ulcerans* in mosquitoes in southeastern Australia. *PLoS neglected tropical diseases*. 2011 Sep;5(9):e1305.



- 395 21. Marsollier L, Andre JP, Frigui W, Reysset G, Milon G, Carbonnelle B, et al. Early  
396 trafficking events of *Mycobacterium ulcerans* within *Naucoris cimicoides*. Cellular microbiology.  
397 2007 Feb;9(2):347-55.
- 398 22. Marsollier L, Aubry J, Coutanceau E, Andre JP, Small PL, Milon G, et al. Colonization of  
399 the salivary glands of *Naucoris cimicoides* by *Mycobacterium ulcerans* requires host plasmatocytes  
400 and a macrolide toxin, mycolactone. Cellular microbiology. 2005 Jul;7(7):935-43.
- 401 23. Marsollier L, Robert R, Aubry J, Saint Andre JP, Kouakou H, Legras P, et al. Aquatic  
402 insects as a vector for *Mycobacterium ulcerans*. Applied and environmental microbiology. 2002  
403 Sep;68(9):4623-8.
- 404 24. Gordon CL, Buntine JA, Hayman JA, Lavender CJ, Fyfe JA, Hosking P, et al. All-oral  
405 antibiotic treatment for buruli ulcer: a report of four patients. PLoS neglected tropical diseases.  
406 2010;4(11):e770.
- 407 25. Trubiano JA, Lavender CJ, Fyfe JA, Bittmann S, Johnson PD. The incubation period of  
408 Buruli ulcer (*Mycobacterium ulcerans* infection). PLoS neglected tropical diseases.  
409 2013;7(10):e2463.
- 410 26. Barnett HC. The incrimination of arthropods as vectors of disease. . In: Strouhal H, Beier M,  
411 editors. Proceedings of the 11th International Congress of Entomology; 1962; 1962. p. 341-5.
- 412 27. Johnson PD, Lavender CJ. Correlation between Buruli ulcer and vector-borne notifiable  
413 diseases, Victoria, Australia. Emerging infectious diseases. 2009 Apr;15(4):614-5.
- 414 28. Lavender CJ, Stinear TP, Johnson PD, Azuolas J, Benbow ME, Wallace JR, et al.  
415 Evaluation of VNTR typing for the identification of *Mycobacterium ulcerans* in environmental  
416 samples from Victoria, Australia. FEMS microbiology letters. 2008 Oct;287(2):250-5.
- 417 29. Hong H, Gates PJ, Staunton J, Stinear T, Cole ST, Leadlay PF, et al. Identification using  
418 LC-MSn of co-metabolites in the biosynthesis of the polyketide toxin mycolactone by a clinical  
419 isolate of *Mycobacterium ulcerans*. Chemical communications. 2003 Nov 21(22):2822-3.

- 420 30. Axford JK, Ross PA, Yeap HL, Callahan AG, Hoffmann AA. Fitness of wAlbB Wolbachia  
421 Infection in Aedes aegypti: Parameter Estimates in an Outcrossed Background and Potential for  
422 Population Invasion. The American journal of tropical medicine and hygiene. 2015 Dec 28.
- 423 31. Fyfe JA, Lavender CJ, Johnson PD, Globan M, Sievers A, Azuolas J, et al. Development  
424 and application of two multiplex real-time PCR assays for the detection of *Mycobacterium ulcerans*  
425 in clinical and environmental samples. Applied and environmental microbiology. 2007  
426 Aug;73(15):4733-40.
- 427 32. Hill AB. The Environment and Disease: Association or Causation? Proc R Soc Med. 1965  
428 May;58:295-300.
- 429 33. Gray SM, Banerjee N. Mechanisms of arthropod transmission of plant and animal viruses.  
430 Microbiol Mol Biol Rev. 1999 Mar;63(1):128-48.
- 431 34. Kuno G, Chang GJ. Biological transmission of arboviruses: reexamination of and new  
432 insights into components, mechanisms, and unique traits as well as their evolutionary trends.  
433 Clinical microbiology reviews. 2005 Oct;18(4):608-37.
- 434 35. Higgs S, Beatty BJ. Natural cycles of vector-borne pathogens. In: Marquardt WC, editor.  
435 Biology of Disease Vectors. 2nd ed. New York, NY: Elsevier Academic Press; 2005. p. 167-85.
- 436 36. Chamberlain RW, Sudia WD. Mechanism of transmission of viruses by mosquitoes. Annu  
437 Rev Entomol. 1961;6:371-90.
- 438 37. Harris KF. An ingestion-egestion hypothesis of noncirculative virus transmission. In:  
439 Mandahar L, editor. Plant Viruses. Boca Raton Inc., Fla: CRC Press; 1990. p. 177-204.
- 440 38. Wallace JR, Gordon MC, Hartsell L, Mosi L, Benbow ME, Merritt RW, et al. Interaction of  
441 *Mycobacterium ulcerans* with mosquito species: implications for transmission and trophic  
442 relationships. Applied and environmental microbiology. 2010 Sep;76(18):6215-22.
- 443 39. Clements AN. The biology of mosquitoes. Volume 1, Development, Nutrition, and  
444 Reproduction. New York, NY: Chapman & Hall Publishers; 1992.

- 445 40. Hugh-Jones M, Blackburn J. The ecology of *Bacillus anthracis*. *Mol Aspects Med*. 2009  
446 Dec;30(6):356-67.
- 447 41. Petersen JM, Mead PS, Schriefer ME. *Francisella tularensis*: an arthropod-borne pathogen.  
448 *Vet Res*. 2009 Mar-Apr;40(2):7.
- 449 42. Debacker M, Zinsou C, Aguiar J, Meyers W, Portaels F. *Mycobacterium ulcerans* disease  
450 (Buruli ulcer) following human bite. *Lancet*. 2002 Dec 7;360(9348):1830.
- 451 43. Debacker M, Zinsou C, Aguiar J, Meyers WM, Portaels F. First case of *Mycobacterium*  
452 *ulcerans* disease (Buruli ulcer) following a human bite. *Clinical infectious diseases : an official*  
453 *publication of the Infectious Diseases Society of America*. 2003 Mar 1;36(5):e67-8.
- 454 44. Hofer M, Hirschel B, Kirschner P, Beghetti M, Kaelin A, Siegrist CA, et al. Brief report:  
455 disseminated osteomyelitis from *Mycobacterium ulcerans* after a snakebite. *The New England*  
456 *journal of medicine*. 1993 Apr 8;328(14):1007-9.
- 457 45. Meyers WM, Shelly WM, Connor DH, Meyers EK. Human *Mycobacterium ulcerans*  
458 infections developing at sites of trauma to skin. *The American journal of tropical medicine and*  
459 *hygiene*. 1974 Sep;23(5):919-23.
- 460 46. Barker DJ. Epidemiology of *Mycobacterium ulcerans* infection. *Transactions of the Royal*  
461 *Society of Tropical Medicine and Hygiene*. 1973;67(1):43-50.
- 462 47. Williamson HR, Mosi L, Donnell R, Aqqad M, Merritt RW, Small PL. *Mycobacterium*  
463 *ulcerans* fails to infect through skin abrasions in a guinea pig infection model: implications for  
464 transmission. *PLoS neglected tropical diseases*. 2014 Apr;8(4):e2770.
- 465 48. Bratschi MW, Ruf MT, Andreoli A, Minyem JC, Kerber S, Wantong FG, et al.  
466 *Mycobacterium ulcerans* persistence at a village water source of Buruli ulcer patients. *PLoS*  
467 *neglected tropical diseases*. 2014 Mar;8(3):e2756.
- 468 49. Carson C, Lavender CJ, Handasyde KA, O'Brien CR, Hewitt N, Johnson PD, et al. Potential  
469 wildlife sentinels for monitoring the endemic spread of human buruli ulcer in South-East australia.  
470 *PLoS neglected tropical diseases*. 2014;8(1):e2668.

- 471 50. Tobias NJ, Seemann T, Pidot SJ, Porter JL, Marsollier L, Marion E, et al. Mycolactone gene  
472 expression is controlled by strong SigA-like promoters with utility in studies of *Mycobacterium*  
473 *ulcerans* and buruli ulcer. PLoS neglected tropical diseases. 2009;3(11):e553.
- 474 51. Zogo B, Djenontin A, Carolan K, Babonneau J, Guegan JF, Eyangoh S, et al. A Field Study  
475 in Benin to Investigate the Role of Mosquitoes and Other Flying Insects in the Ecology of  
476 *Mycobacterium ulcerans*. PLoS neglected tropical diseases. 2015;9(7):e0003941.
- 477 52. Roche B, Benbow ME, Merritt R, Kimbirauskas R, McIntosh M, Small PL, et al.  
478 Identifying the Achilles' heel of multi-host pathogens: The concept of keystone "host" species  
479 illustrated by transmission. Environmental research letters : ERL [Web site]. 2013;8(4):045009.
- 480 53. Lavender CJ, Fyfe JA. Direct detection of *Mycobacterium ulcerans* in clinical specimens  
481 and environmental samples. Methods in molecular biology. 2013;943:201-16.
- 482 54. Quek TY, Henry MJ, Pasco JA, O'Brien DP, Johnson PD, Hughes A, et al. *Mycobacterium*  
483 *ulcerans* infection: factors influencing diagnostic delay. The Medical journal of Australia. 2007  
484 Nov 19;187(10):561-3.
- 485 55. Bratschi MW, Steinmann P, Wickenden A, Gillis TP. Current knowledge on  
486 *Mycobacterium leprae* transmission: a systematic literature review. Leprosy review. 2015  
487 Jun;86(2):142-55.
- 488 56. Shepard CC, McRae DH. *Mycobacterium Leprae* in Mice: Minimal Infectious Dose,  
489 Relationship between Staining Quality and Infectivity, and Effect of Cortisone. Journal of  
490 bacteriology. 1965 Feb;89:365-72.
- 491 57. Andreu N, Zelmer A, Fletcher T, Elkington PT, Ward TH, Ripoll J, et al. Optimisation of  
492 bioluminescent reporters for use with mycobacteria. PloS one. 2010;5(5):e10777.
- 493 58. Omansen TF, Porter JL, Johnson PD, van der Werf TS, Stienstra Y, Stinear TP. In-vitro  
494 activity of avermectins against *Mycobacterium ulcerans*. PLoS neglected tropical diseases. 2015  
495 Mar;9(3):e0003549.

496

497

498

**Table 1: Summary of transmission experiments**

| Trauma source                                                                                      | Number of mice           | Mouse tail coated                                     | Number of mice bitten | Number of mice developing BU  | Estimated dose (CFU) |
|----------------------------------------------------------------------------------------------------|--------------------------|-------------------------------------------------------|-----------------------|-------------------------------|----------------------|
| <b><i>Experiment 1:</i></b><br>(Atypical mechanical transmission model, contaminated skin surface) |                          |                                                       |                       |                               |                      |
| <i>Aedes notoscriptus</i>                                                                          | 12<br>(4/mosquito cage)* | <i>M. ulcerans</i><br>(4.1x 10 <sup>6</sup> CFU/mL)   | 6                     | 2<br>(#182, #191)             | 21                   |
| <i>Aedes notoscriptus</i>                                                                          | 4<br>(1/mosquito cage)   | Media-only                                            | 2                     | 0                             | -                    |
| Sterile needle (25G)                                                                               | 5                        | <i>M. ulcerans</i><br>(4.1x 10 <sup>6</sup> CFU/mL)   | -                     | 4<br>(#186, #200, #201, #202) | 55                   |
| None                                                                                               | 6                        | <i>M. ulcerans</i><br>(4.1x 10 <sup>6</sup> CFU/mL)   | -                     | 0                             | -                    |
| <b><i>Experiment 2:</i></b><br>(Atypical mechanical transmission model, contaminated skin surface) |                          |                                                       |                       |                               |                      |
| <i>Aedes aegypti</i>                                                                               | 5<br>(1/mosquito cage)   | <i>M. ulcerans</i><br>(1.83 x 10 <sup>6</sup> CFU/mL) | 5 <sup>#</sup>        | 0                             | 9                    |
| <i>Aedes aegypti</i>                                                                               | 3<br>(1/mosquito cage)   | Media-only                                            | 2                     | 0                             | -                    |
| Sterile needle (25G)                                                                               | 5                        | <i>M. ulcerans</i><br>(1.83 x 10 <sup>6</sup> CFU/mL) | -                     | 4<br>(#216, #217, #218, #219) | 40                   |

|                                                                                                                                            |   |                                                       |   |   |                      |
|--------------------------------------------------------------------------------------------------------------------------------------------|---|-------------------------------------------------------|---|---|----------------------|
| None                                                                                                                                       | 5 | <i>M. ulcerans</i><br>(1.83 x 10 <sup>6</sup> CFU/mL) | - | 0 | -                    |
| <b>Experiment 3:</b><br>(Mechanical transmission model<br><i>sensu strictu</i> with adult mosquitoes<br>passively fed <i>M. ulcerans</i> ) |   |                                                       |   |   |                      |
| <i>Aedes notoscriptus</i>                                                                                                                  | 5 |                                                       | 5 | 0 | < 48 GE <sup>§</sup> |
| Sterile needle (30G)                                                                                                                       | 3 | <i>M. ulcerans</i><br>(3.9 x 10 <sup>6</sup> CFU/mL)  | - | 3 | 14                   |
| None                                                                                                                                       | 3 | <i>M. ulcerans</i><br>(3.9 x 10 <sup>6</sup> CFU/mL)  | - | 0 | -                    |
| <b>Experiment 4:</b><br>(Atypical mechanical transmission,<br>contaminated skin surface model)                                             |   |                                                       |   |   |                      |
| Sterile needle (25G)                                                                                                                       | 7 | <i>M. ulcerans</i><br>(3.7 x 10 <sup>6</sup> CFU/mL)  | - | 7 | 49                   |
| Sterile needle (25G)                                                                                                                       | 3 | <i>M. ulcerans</i><br>(3.7 x 10 <sup>5</sup> CFU/mL)  | - | 2 | 5                    |
| None                                                                                                                                       | 5 | <i>M. ulcerans</i><br>(3.7 x 10 <sup>6</sup> CFU/mL)  | - | 0 | -                    |
|                                                                                                                                            |   |                                                       |   |   |                      |

**Notes:** \*20 adult female mosquitoes per cage; #Multiple bites per mouse with 2 mice receiving 3 bites and 1 mouse receiving 2 bites; <sup>§</sup>“GE” is *M. ulcerans* genome equivalents as estimate based on IS2404 qPCR.

**Fig. 1**

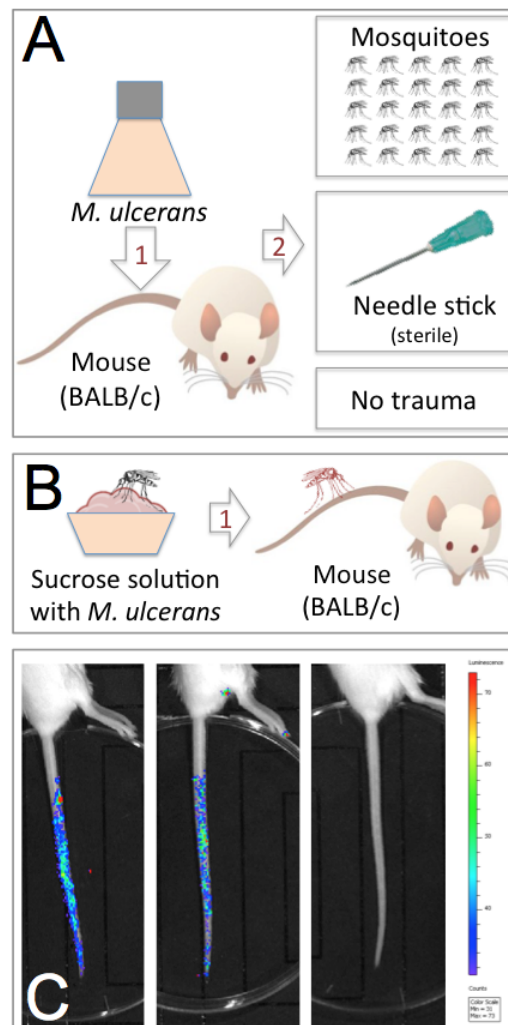

**Fig.1: Schematic representations of the two BU transmission models tested in this study.** (A) Model-1 tests transmission of *M. ulcerans* present on a skin surface following a puncturing injury created by mosquito blood-feeding or needle stick. (B) Model-2 tests transmission of *M. ulcerans* acquired by mosquitoes from a contaminated sugar feed solution. (C) Visualization of bioluminescent *M. ulcerans* JKD8049 (harbouring plasmid pMV306 *hsp:lucG13*) (57, 58) on the mouse-tail in model-1, showing the distribution of bacteria immediately after coating for two mice, versus an uncoated animal. *M. ulcerans* concentration was  $10^6$  CFU/mL.



**Fig. 2**

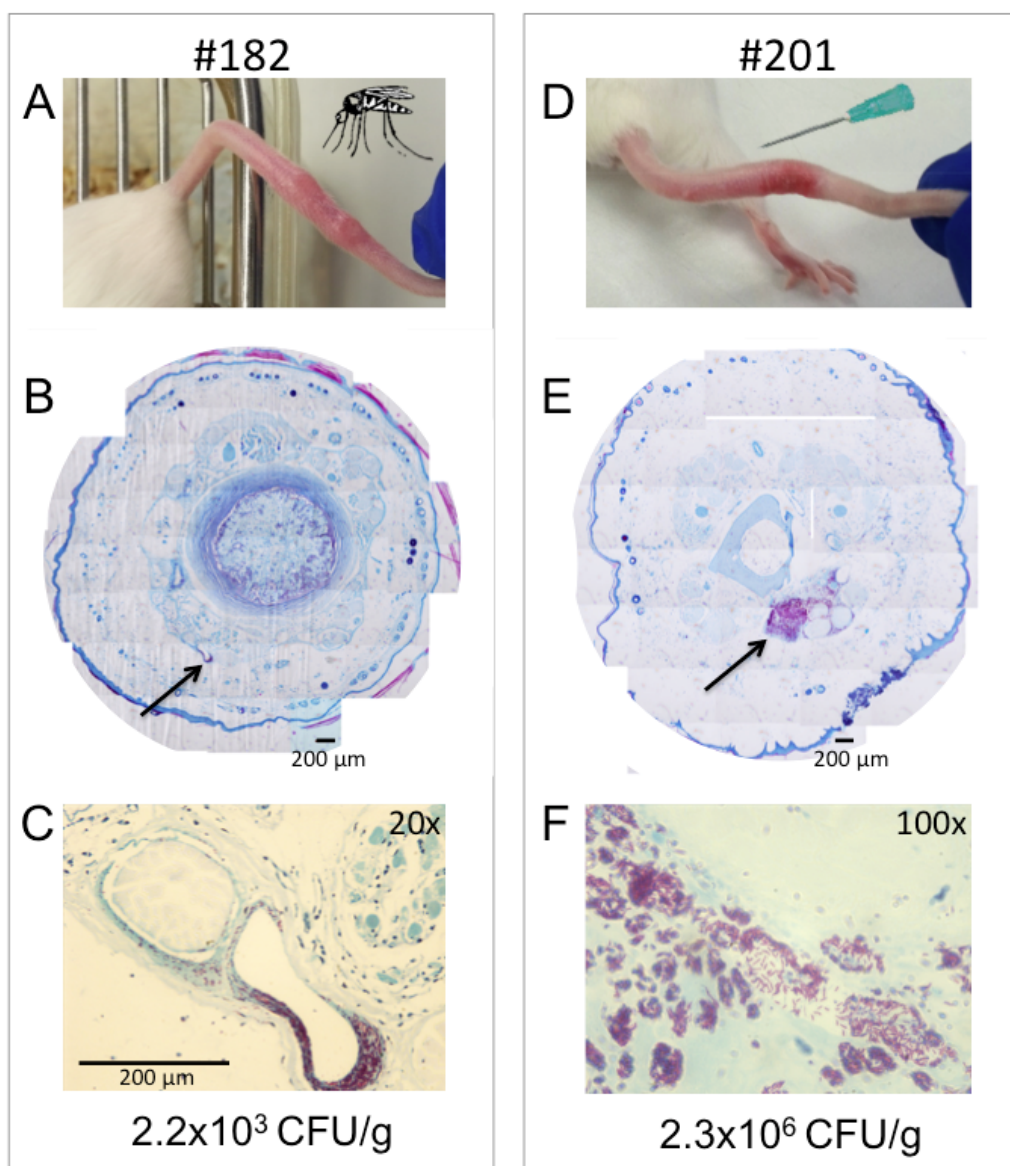

**Fig. 2: Atypical mechanical transmission of *M. ulcerans*.** (A) An example of the development of Buruli ulcer following mosquito blood-feeding through a skin surface (mouse-tail) contaminated with *M. ulcerans*. (B) Composite histological cross-section with Ziehl–Neelsen staining through the infected tail showing the focus of AFB bacteria (arrow) within the subcutaneous tissue. (C) Higher magnification view of the focus of infection, with the yield of viable *M. ulcerans* obtained from the infected tissue. Panels (D) – (F) show the same analyses as for the mosquito-bitten mouse #182, but for a mouse developing a lesion following sterile needle-stick puncture through a contaminated skin surface (mouse #201).

**Fig. 3**

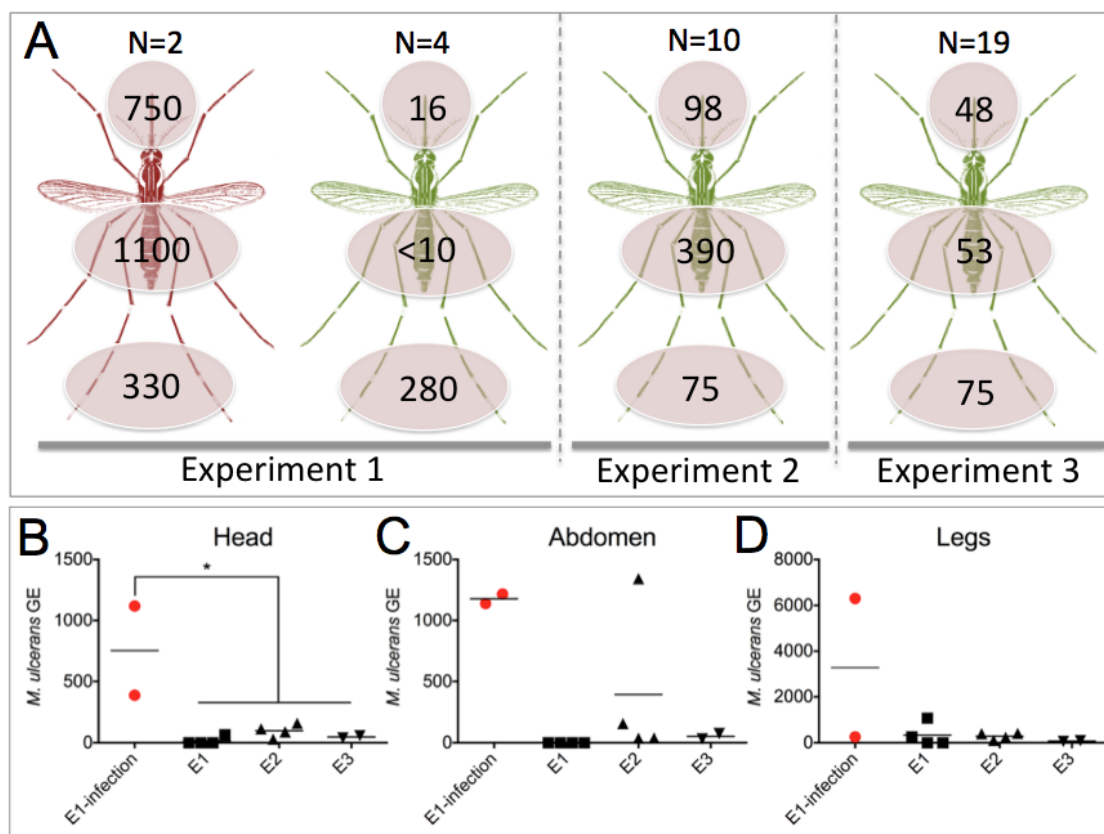

**Fig. 3: Summary of *M. ulcerans* burden on mosquitoes post-feeding under two models of transmission.** (A) Visualization of the mean number of *M. ulcerans* detected per dissected mosquito segment, as assessed by IS2404 qPCR and expressed as genome equivalents (GE), for model-1 (experiments 1 and 2) and model-2 (experiment 3). ‘N’ indicates the total number of mosquitoes tested. Red-shaded mosquitoes transmitted *M. ulcerans*, leading to mouse tail lesions. Green-shaded mosquitoes blood-fed on mouse tails but lesions did not develop. (B, C, D) Plots of the individual qPCR results for each mosquito segment, listed by experiment. Red dots correspond to qPCR bacterial load for mosquitoes that transmitted *M. ulcerans* infection. Null hypothesis (no difference in bacterial load) was rejected ( $p < 0.05$ )\* (unpaired, two-tailed *t* test). Horizontal bar indicates the mean bacterial load per mosquito. The y-axis is GE and x-axis is experiment. The qPCR data for individual insects is contained in Supplementary Table S2.

**Fig. 4**

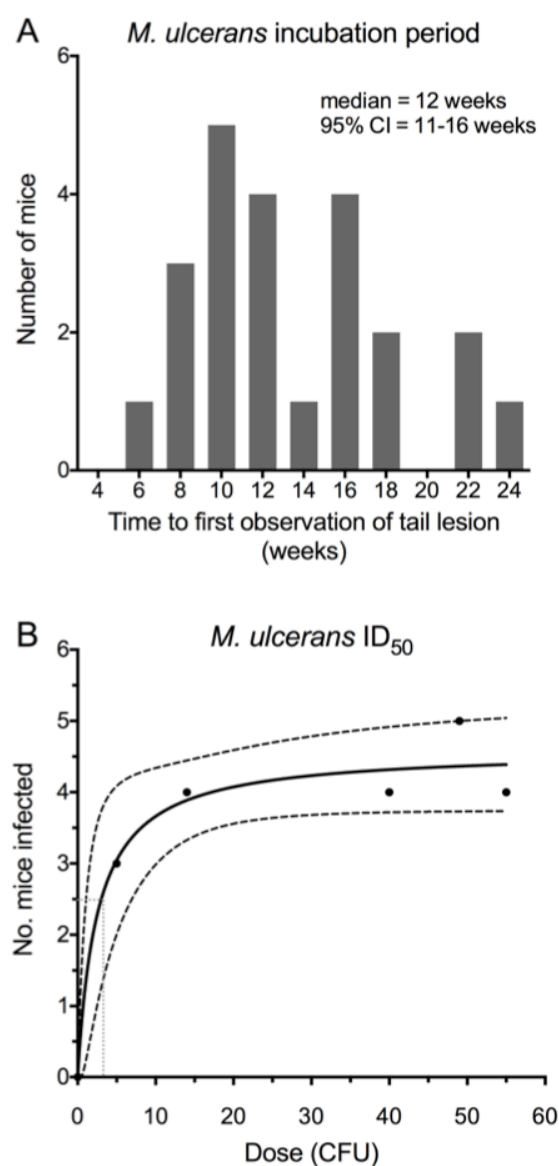

**Fig.4: *M. ulcerans* incubation period and infectious dose<sub>50</sub>.** (A) Incubation period of *M. ulcerans* based on the time between sterile-needle puncture of an *M. ulcerans* contaminated mouse-tail and first observation of a lesion. (B) Estimated *M. ulcerans* ID<sub>50</sub> for transmission model-1.
